# Supplementary material for: Tungsten disulfide-based nanocomposites for photothermal therapy
Source: publisher site journal article supplement (doi:10.3762/bjnano.10.81), 2019-04-02
Supplement: Additional file 1 [file 2190-4286-10-81-S1.pdf]

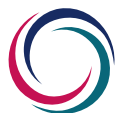

## Supporting Information

for

### **Tungsten disulfide-based nanocomposites for photothermal therapy**

Tzuriel Levin, Hagit Sade, Rina Ben-Shabbat Binyamini, Maayan Pour, Iftach Nachman and Jean-Paul Lellouche

*Beilstein J. Nanotechnol.* **2019**, *10*, 811–822. [doi:10.3762/bjnano.10.81](https://doi.org/10.3762/bjnano.10.81)

### **Selected FTIR characterisation data and viability tests using MCF7 cells**

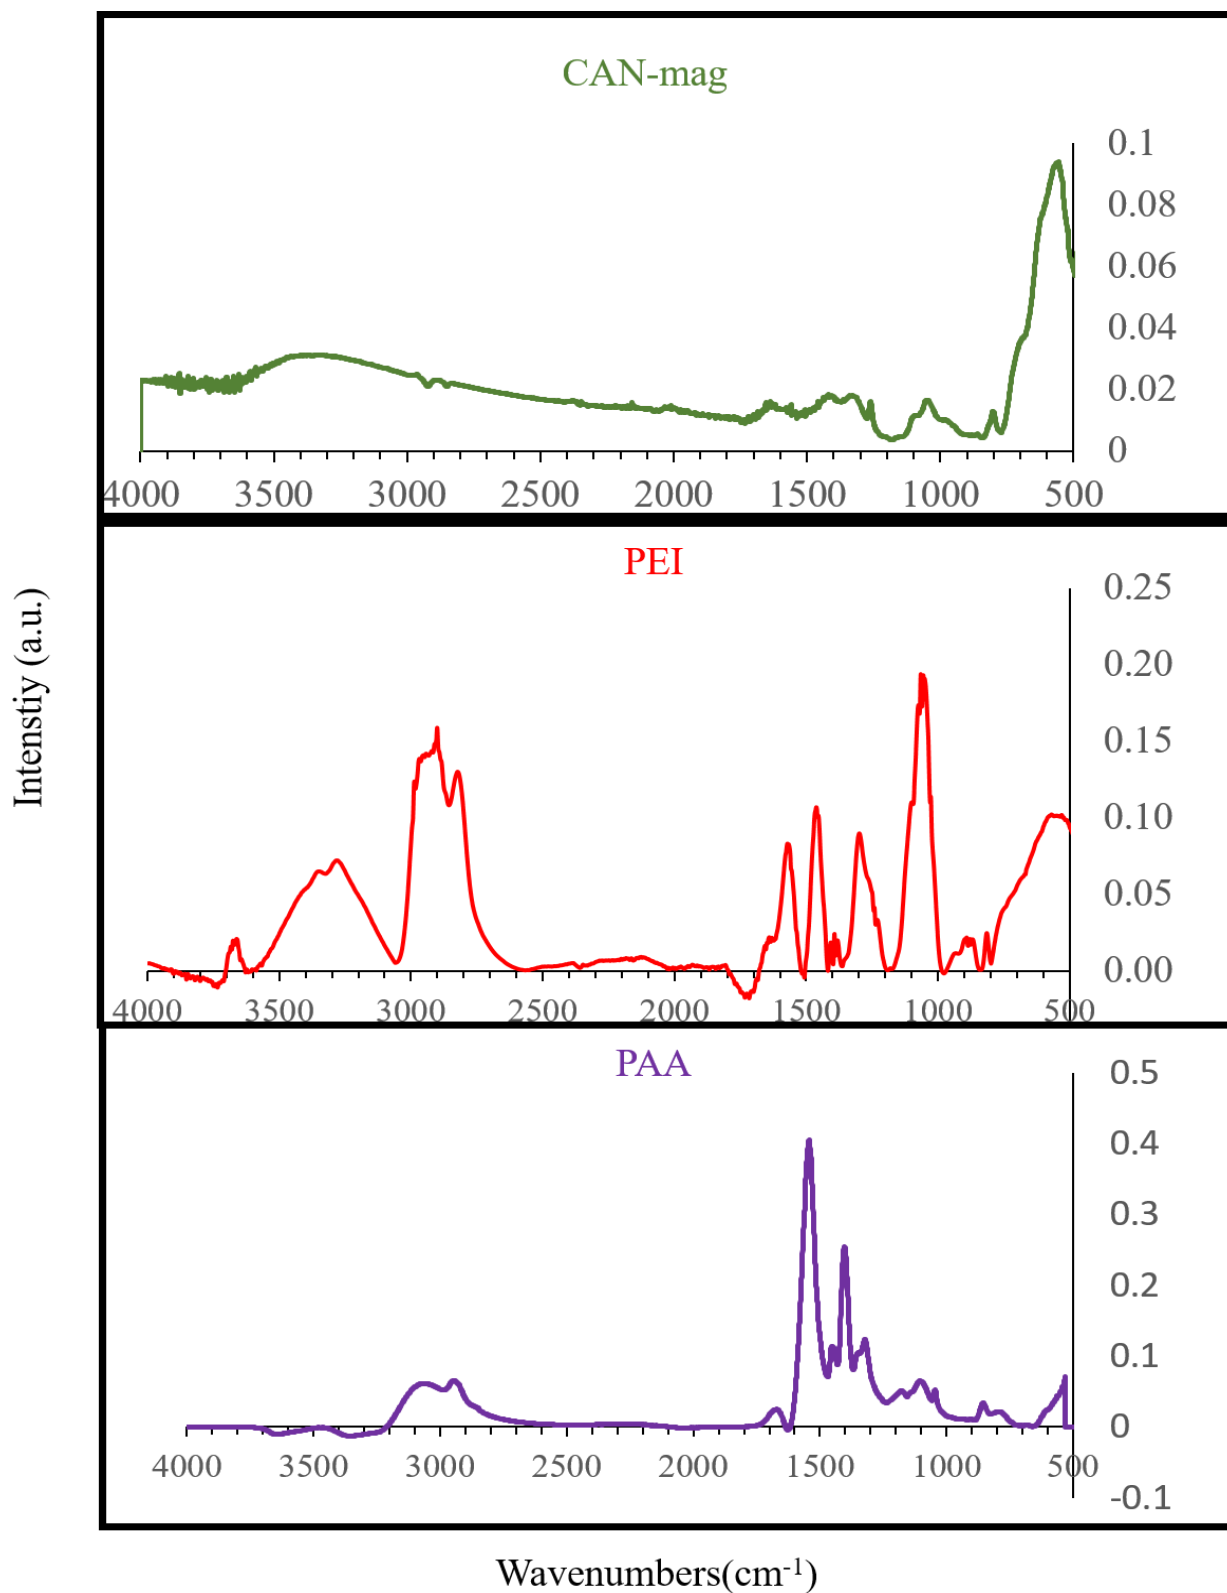

**Figure S1:** FTIR absorbance spectra of CAN-mag, polyethylenimine, and poly(acrylic acid).

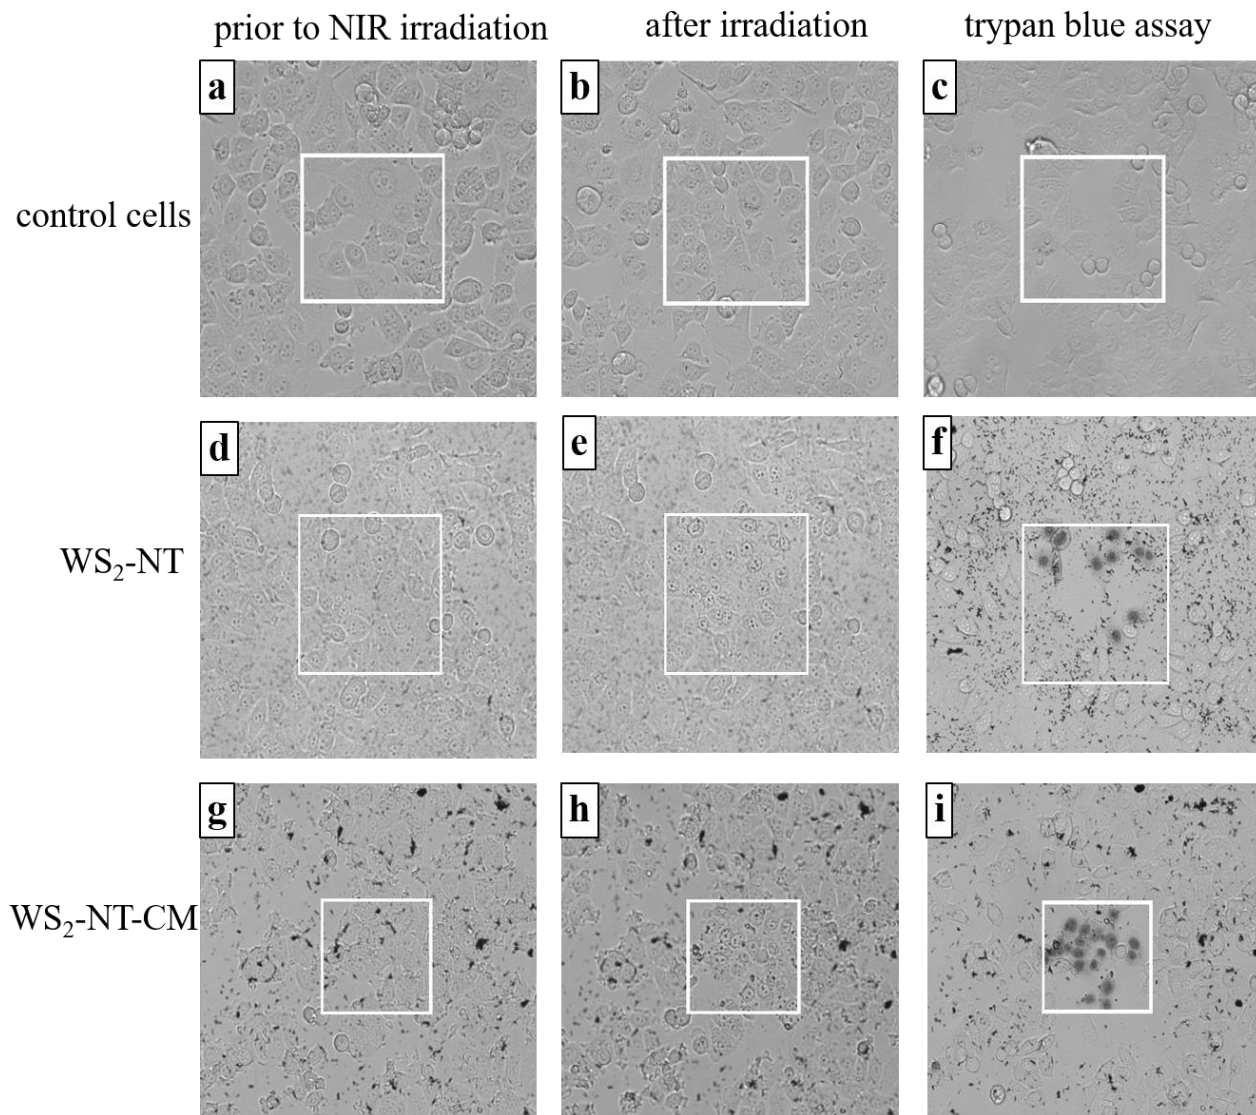

**Figure S2:** Phase-contrast microscopy images of MCF7 cells. The white squares indicate  $157 \mu\text{m} \times 157 \mu\text{m}$  areas irradiated with an NIR (700 nm) laser. Left column: cells prior to NIR irradiation; middle column: after irradiation for 1 minute; right column: after irradiation for 1 minute and application of trypan blue assay. (a–c) Control (untreated) cells; (d–f) Cells pre-incubated with WS<sub>2</sub>-NT; (g–i) Cells pre-incubated with WS<sub>2</sub>-NT-CM.
